# Supplementary material for: Experimentally exploring the conformational space sampled by domain reorientation in calmodulin
Source: HighWire-hosted journal article supplement (doi:10.1073/pnas.0308641101), 2004-04-20
Supplement: 08641Table2.pdf [file 08641Table2.pdf]

**Table 2. Acquired spectra and experimental parameters**

| Experiment                                                     | Dimensions of acquired data<br>(nucleus) |                       |                      | Spectral width, Hz |       |       |
|----------------------------------------------------------------|------------------------------------------|-----------------------|----------------------|--------------------|-------|-------|
|                                                                | $t_1$                                    | $t_2$                 | $t_3$                | $F_1$              | $F_2$ | $F_3$ |
| $^1\text{H}$ - $^{15}\text{N}$ -HSQC                           | 256( $^{15}\text{N}$ )                   | 1024( $^1\text{H}$ )  |                      | 2500               | 11261 |       |
| [ $^1\text{H}$ - $^1\text{H}$ ]-NOESY                          | 1024( $^1\text{H}$ )                     | 2048( $^1\text{H}$ )  |                      | 10416              | 10416 |       |
| CBCANH                                                         | 128( $^{13}\text{C}$ )                   | 48( $^{15}\text{N}$ ) | 2048( $^1\text{H}$ ) | 13404              | 3548  | 10416 |
| CBCA(CO)NH                                                     | 128( $^{13}\text{C}$ )                   | 48( $^{15}\text{N}$ ) | 2048( $^1\text{H}$ ) | 13404              | 3548  | 10416 |
| HNHA                                                           | 128( $^1\text{H}$ )                      | 48( $^{15}\text{N}$ ) | 1024( $^1\text{H}$ ) | 10416              | 3548  | 10416 |
| (H)CCH-TOCSY                                                   | 128( $^{13}\text{C}$ )                   | 80( $^{13}\text{C}$ ) | 2048( $^1\text{H}$ ) | 12500              | 12500 | 10416 |
| $^1\text{H}$ - $^{15}\text{N}$ -HSQC-NOESY                     | 320( $^1\text{H}$ )                      | 48( $^{15}\text{N}$ ) | 2048( $^1\text{H}$ ) | 10416              | 2199  | 10416 |
| $^1\text{H}$ - $^{13}\text{C}$ -HSQC-NOESY                     | 128( $^1\text{H}$ )                      | 64( $^{13}\text{C}$ ) | 1024( $^1\text{H}$ ) | 10416              | 14082 | 10416 |
| $^1\text{H}$ - $^{15}\text{N}$ -HSQC (pcs)                     | 256( $^{15}\text{N}$ )                   | 1024( $^1\text{H}$ )  |                      | 2500               | 11261 |       |
| $^1\text{H}$ - $^{15}\text{N}$ -HSQC ( $J_{\text{NH}}$ -split) | 256( $^{15}\text{N}$ )                   | 1024( $^1\text{H}$ )  |                      | 2500               | 11261 |       |
